# Supplementary material for: Selective electrosynthesis of platform chemicals from the electrocatalytic reforming of biomass-derived hexanediol
Source: Royal Society of Chemistry journal article supplement (doi:10.1039/d3fd00073g), 2023-01-01
Supplement: d3fd00073g1.pdf [file d3fd00073g1.pdf]

***Electronic Supporting Information (ESI)***

**Selective electrosynthesis of platform chemicals from the electrocatalytic  
reforming of biomass-derived hexanediol**

**Yun-Ju Liao<sup>1</sup>, Shih-Ching Huang<sup>1</sup>, Chia-Yu Lin<sup>1,2,3\*</sup>**

*<sup>1</sup>Department of Chemical Engineering, National Cheng Kung University, Tainan City 70101, Taiwan*

*<sup>2</sup>Hierarchical Green-Energy Materials (Hi-GEM) Research Center, National Cheng Kung University, Tainan 70101, Taiwan.*

*<sup>3</sup>Program on Key Materials & Program on Smart and Sustainable Manufacturing, Academy of Innovative Semiconductor and Sustainable Manufacturing, National Cheng Kung University, Tainan, 70101 Taiwan*

\* Corresponding authors: cyl44@mail.ncku.edu.tw

**Contents**

|                          |         |
|--------------------------|---------|
| Supporting Tables S1-S2  | page S2 |
| Supporting Scheme S1     | page S3 |
| Supporting Figures S1–S8 | page S4 |

**Table S1** Summary of results obtained from 2-h CPE of nanoNiOOH-borate at 1.55 V vs. RHE in 1.0 M NaOH solution containing 0.4 M  $\epsilon$ -caprolactone.

| Parameters                              |                         |                                                              |                                         |
|-----------------------------------------|-------------------------|--------------------------------------------------------------|-----------------------------------------|
| Charge passage<br>(C cm <sup>-2</sup> ) | FE <sub>AA</sub><br>(%) | R <sub>AA</sub><br>(mmole cm <sup>-2</sup> h <sup>-1</sup> ) | TOF <sub>AA</sub><br>(s <sup>-1</sup> ) |
| 484.92 ± 67.78                          | 86.35 ± 0.10            | 0.54 ± 0.08                                                  | 0.39 ± 0.05                             |

**Table S2** Summary of results obtained from 2-h CPE of Ni|NiOOH at 1.55 V vs. RHE in 1.0 M NaOH solution containing 0.4 M 1,6-hexanediol.

| Parameters                              |                          |                         |                                                               |                                                              |                                   |                                          |                                         |
|-----------------------------------------|--------------------------|-------------------------|---------------------------------------------------------------|--------------------------------------------------------------|-----------------------------------|------------------------------------------|-----------------------------------------|
| Charge passage<br>(C cm <sup>-2</sup> ) | FE <sub>6HA</sub><br>(%) | FE <sub>AA</sub><br>(%) | R <sub>6HA</sub><br>(μmole cm <sup>-2</sup> h <sup>-1</sup> ) | R <sub>AA</sub><br>(μmole cm <sup>-2</sup> h <sup>-1</sup> ) | R <sub>AA</sub> /R <sub>6HA</sub> | TOF <sub>6HA</sub><br>(s <sup>-1</sup> ) | TOF <sub>AA</sub><br>(s <sup>-1</sup> ) |
| 19.91 ± 5.52                            | 18.25 ± 2.04             | 17.67 ± 4.48            | 12.16 ± 1.23                                                  | 6.43 ± 1.63                                                  | 0.53                              | 0.06 ± 0.01                              | 0.03 ± 0.01                             |

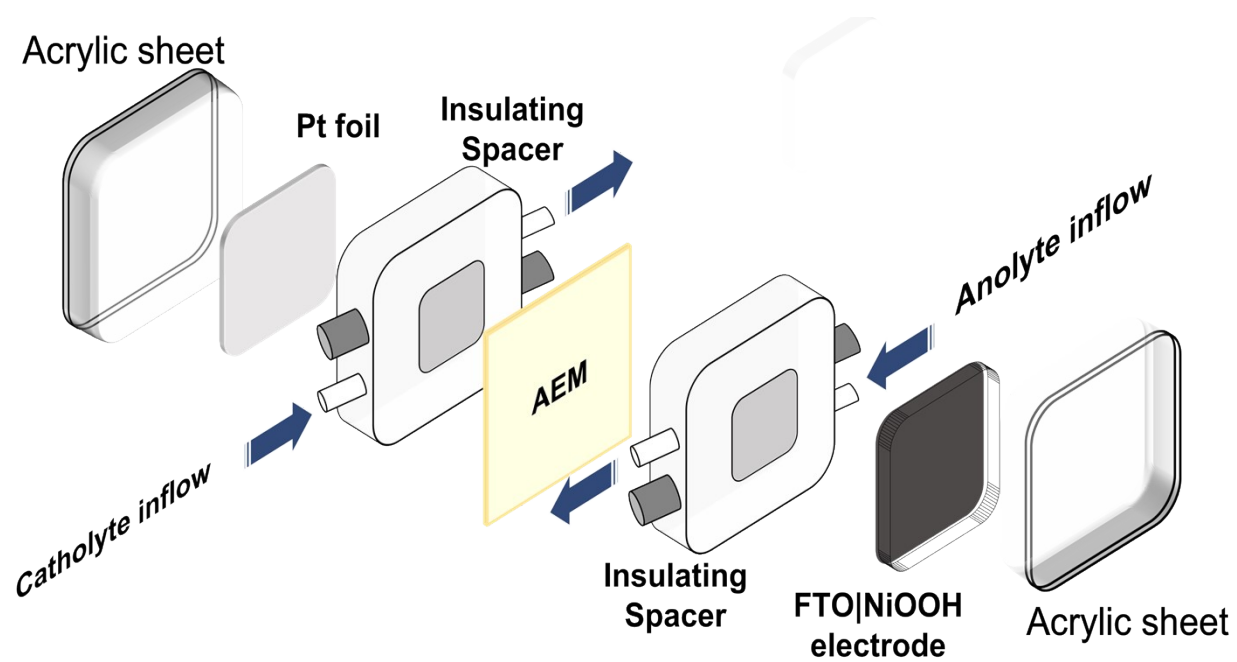

**Scheme S1** Schematic illustration of 5 cm<sup>2</sup> flow-type electrochemical cell.

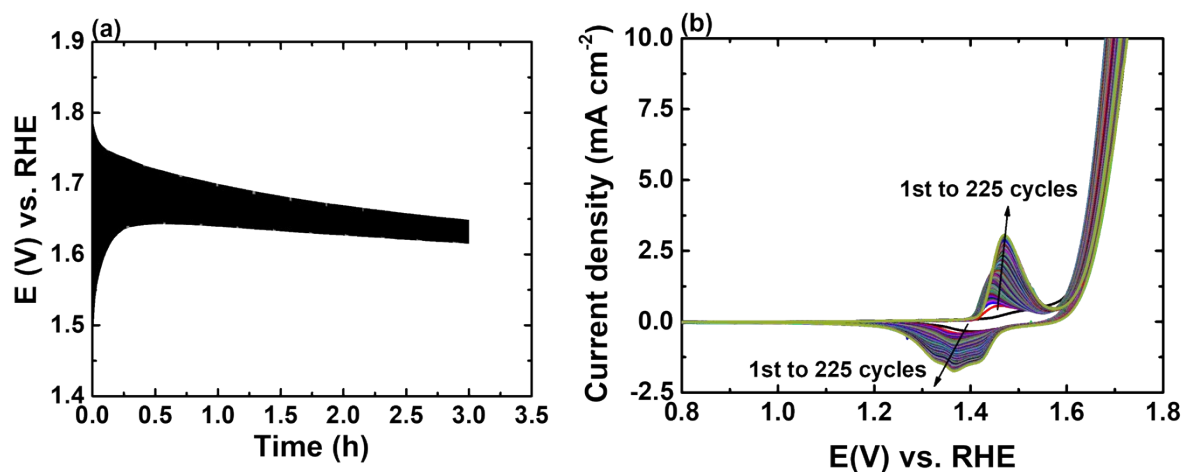

**Figure S1** (a) Potential transient recorded during the PED preparation of the nanoNiOOH-borate electrode. (b) Cyclic voltammetry, recorded at a scan rate of 50 mV s<sup>-1</sup>, during the preparation of the Ni|NiOOH electrode.

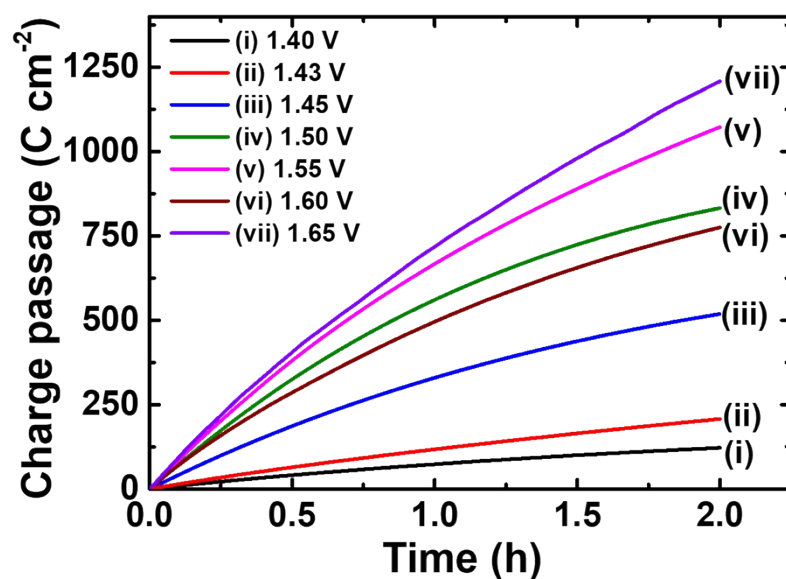

**Figure S2** Charge transient recorded during the 2-h CPEs of the nanoNiOOH-borate electrode at various applied potentials in NaOH solution (1.0 M) containing 1,6-hexanediol (0.4 M).

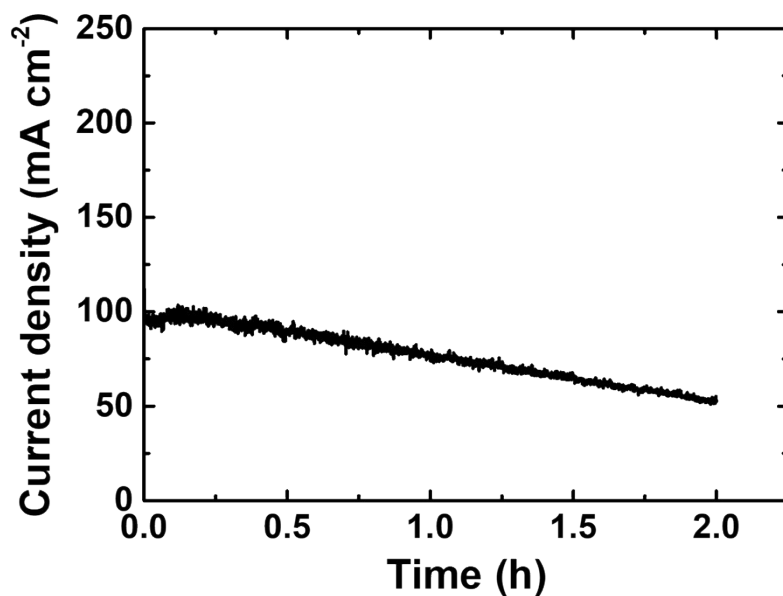

**Figure S3** Current transient recorded during the 2-h CPEs of the nanoNiOOH-borate electrode at 1.55 V vs. RHE in NaOH solution (1.0 M) containing  $\epsilon$ -caprolactone (0.4 M).

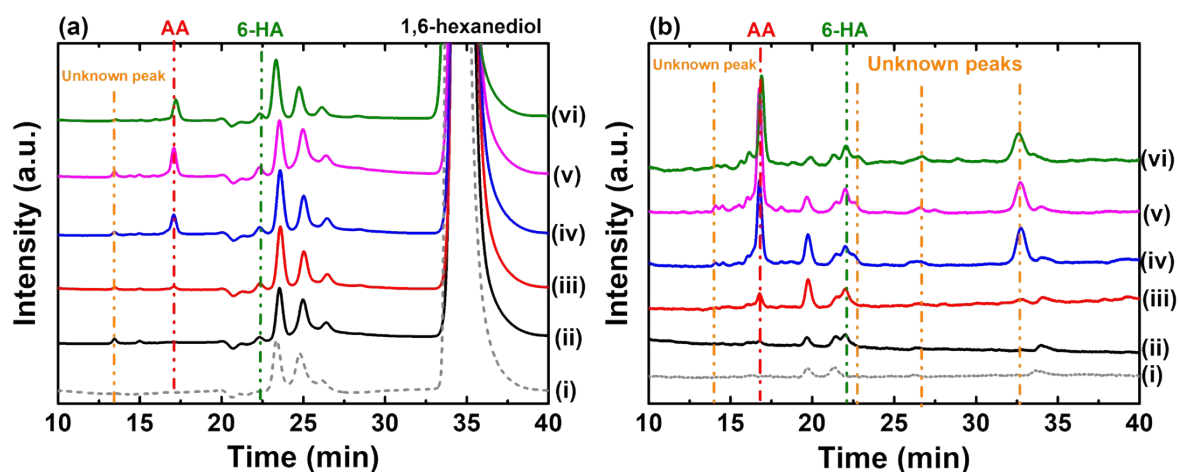

**Figure S4** HPLC chromatograms, recorded with (a) RID detector and (b) PDA detector, of the electrolyte solution before (i) and after 2-h CPEs at different applied potentials (ii: 1.40 V; iii: 1.45 V; iv: 1.50 V; v: 1.55 V; vi: 1.60 V).

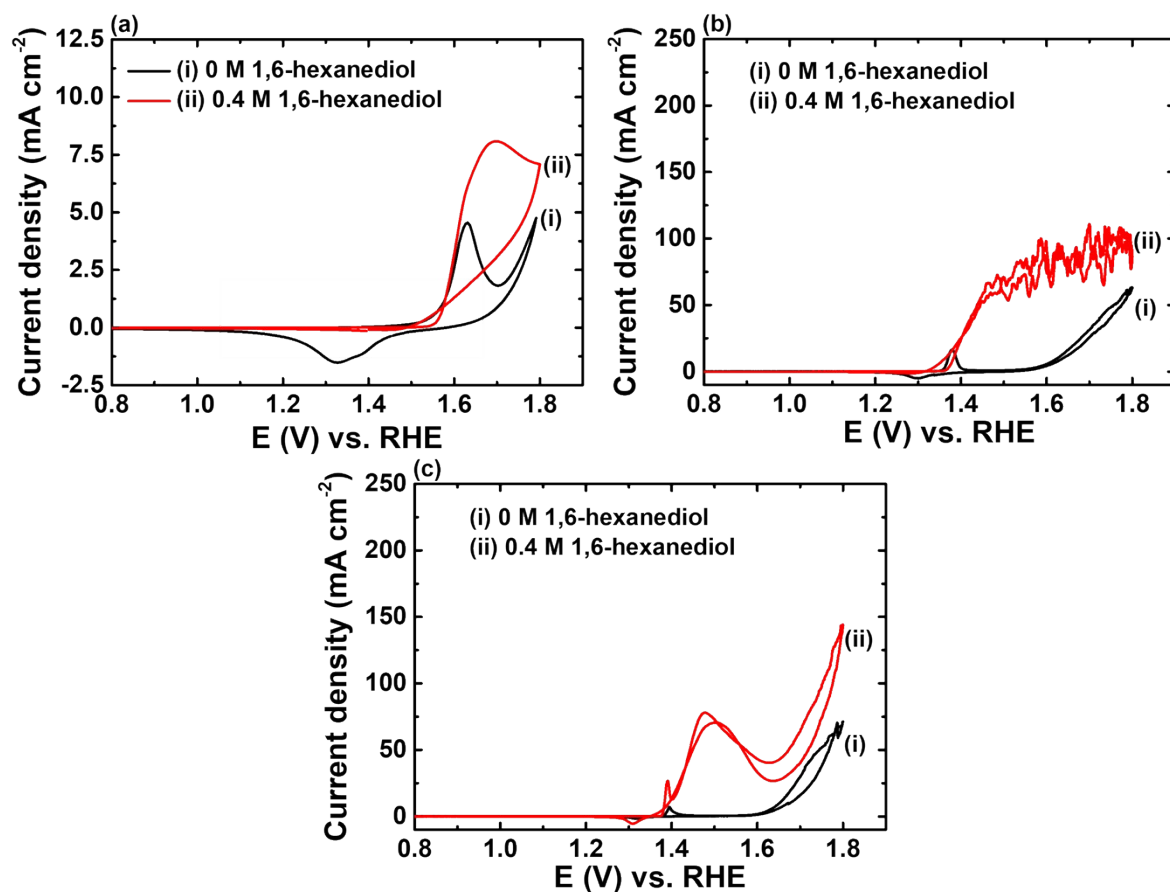

**Figure S5** CVs of the nanoNiOOH-borate electrode, recorded at a scan rate of  $10 \text{ mV s}^{-1}$ , in (i) the blank and (ii) the 1,6-hexanediol (0.4 M)-contained electrolyte solutions (a: 0.1 M borate buffer; b: 0.1 M NaOH; c: 5 M NaOH).

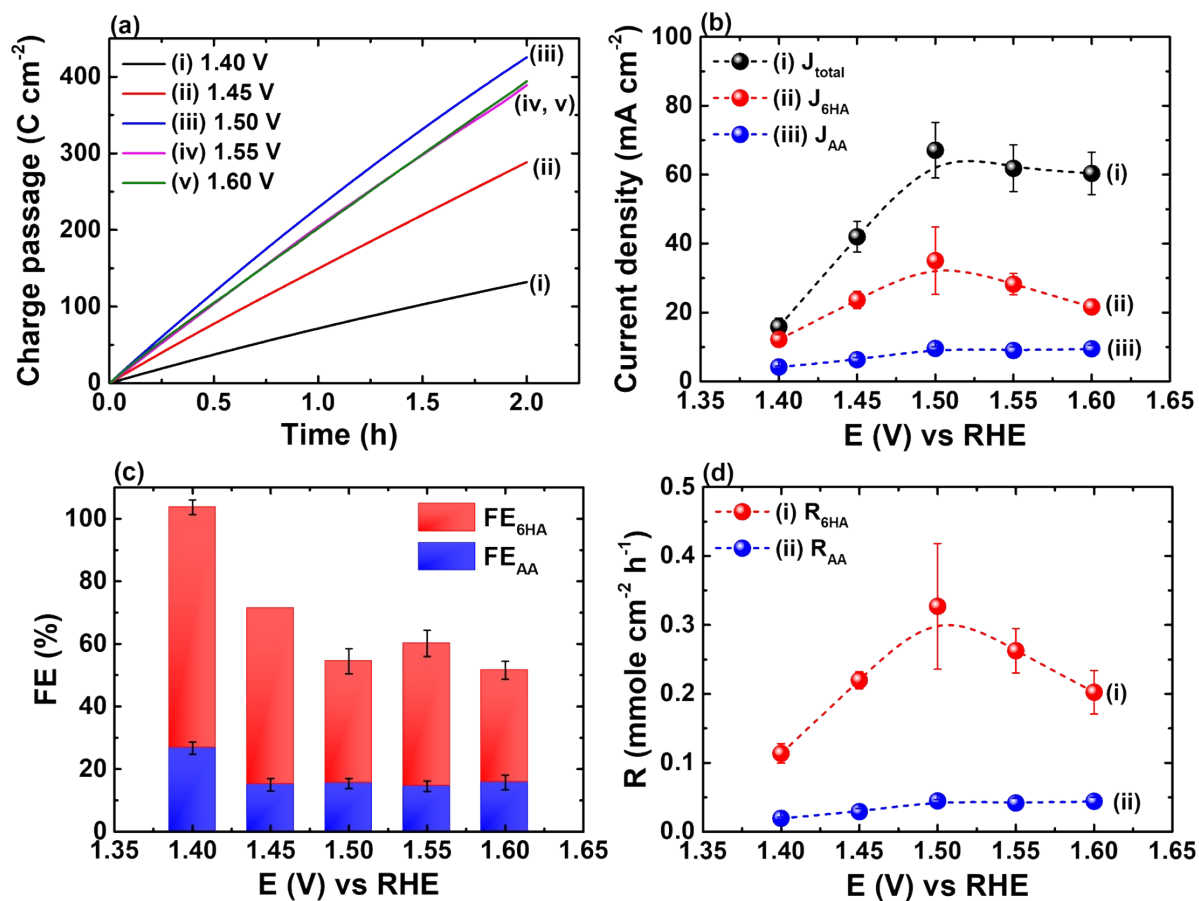

**Figure S6** (a) Charge transient, (b)  $J_{\text{total}}$ ,  $J_{\text{AA}}$ , and  $J_{6\text{HA}}$ , (c)  $\text{FE}_{\text{AA}}$  and  $\text{FE}_{6\text{HA}}$ , and (d)  $R_{\text{AA}}$  and  $R_{6\text{HA}}$ , obtained from 2-h CPEs of the nanoNiOOH-borate electrode at various applied potentials in NaOH (0.1 M) solution containing 1,6-hexanediol (0.4 M).

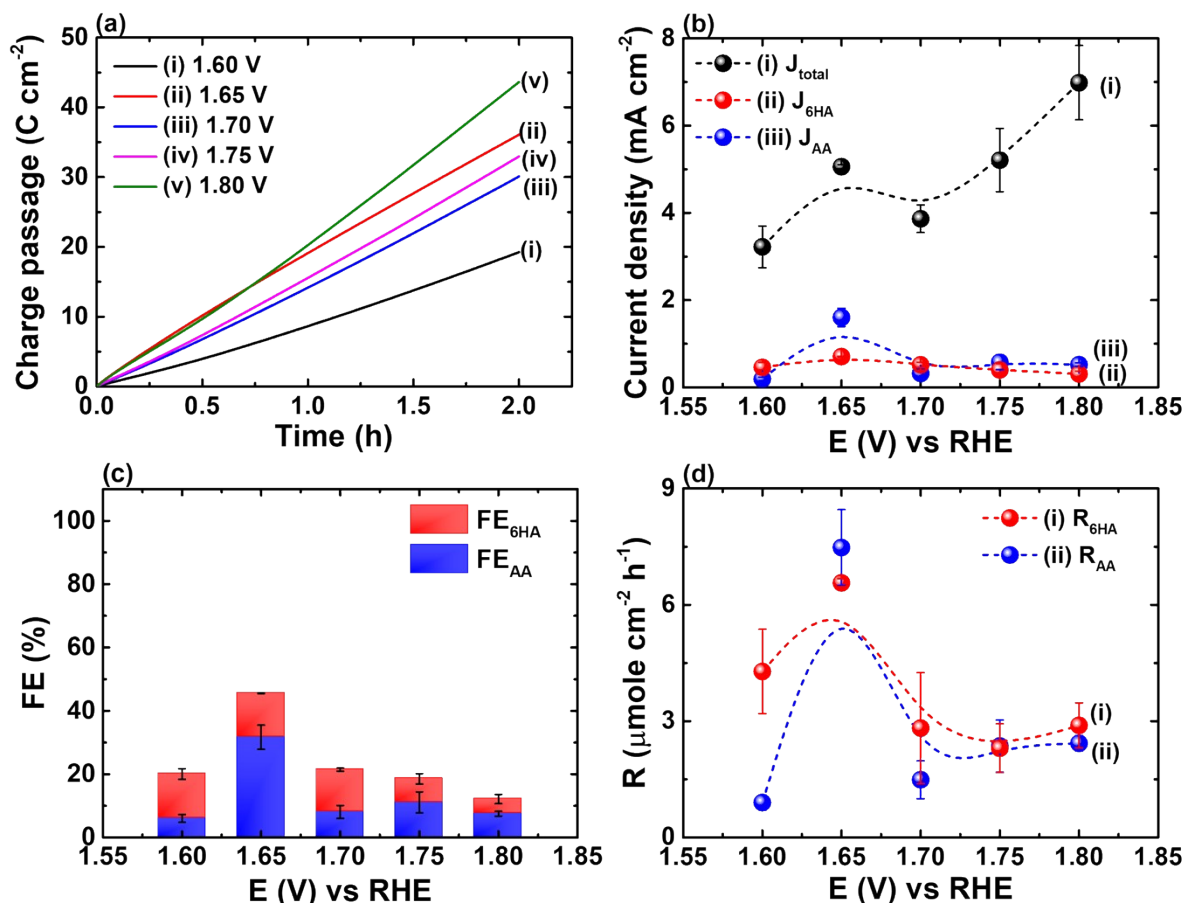

**Figure S7** (a) Charge transient, (b)  $J_{\text{total}}$ ,  $J_{\text{AA}}$ , and  $J_{6\text{HA}}$ , (c)  $\text{FE}_{\text{AA}}$  and  $\text{FE}_{6\text{HA}}$ , and (d)  $R_{\text{AA}}$  and  $R_{6\text{HA}}$ , obtained from 2-h CPEs of the nanoNiOOH-borate electrode at various applied potentials in borate buffer (0.1 M, pH 9.2) containing 1,6-hexanediol (0.4 M).

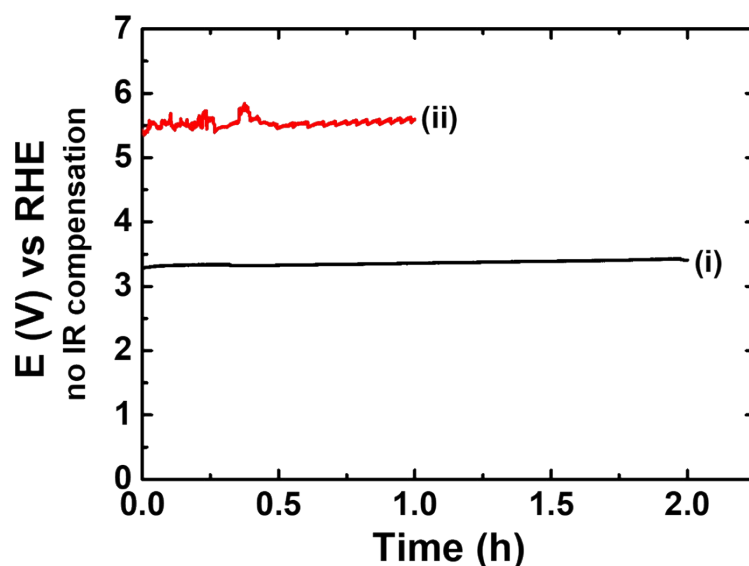

**Figure S8** Chronopotentiograms of the nanoNiOOH-borate electrode recorded at applied current densities of (i) 25  $\text{mA cm}^{-2}$  and (ii) 50  $\text{mA cm}^{-2}$  in NaOH solution (1.0 M, pH 13.6) containing 1,6-hexanediol (0.4 M).
